# Supplementary material
Source: PubMed Central journal article supplement (PMC8566283)
Supplement: kiab335_supplementary_data.pdf [file kiab335_supplementary_data.pdf]

1 **SUPPLEMENTAL INFORMATION**

2 **Supplemental Figures**

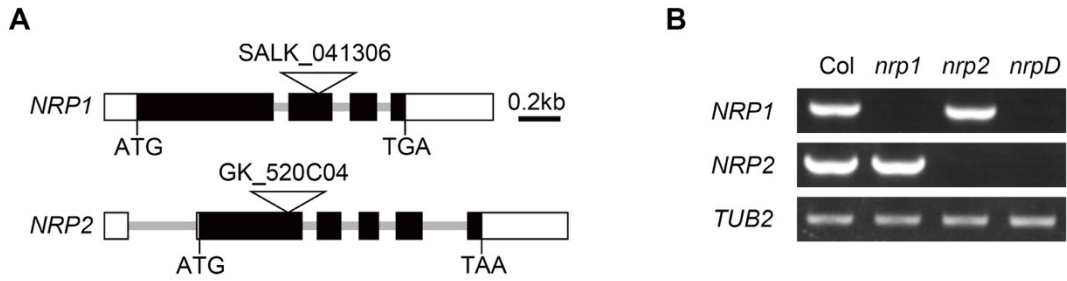

3

4 **Supplemental Figure S1.** Schematic diagram and identification of T-DNA insertion

5 mutants *nrp1* and *nrp2*. A, Gene structure of *NRP1* and *NRP2* with the location of T-

6 DNA insertions. The position of the T-DNA inserts (*nrp1*, SALK\_041306; *nrp2*,

7 GK\_520C04) is indicated by inverted triangles. Black boxes and grey lines denote

8 exons and introns, respectively. White boxes indicate UTRs. B, RT-PCR was

9 performed to detect the *NRP1* and *NRP2* expression in *Col*, *nrp1*, *nrp2*, and *nrpD*.

10 *TUB2* was used as an internal control.

11

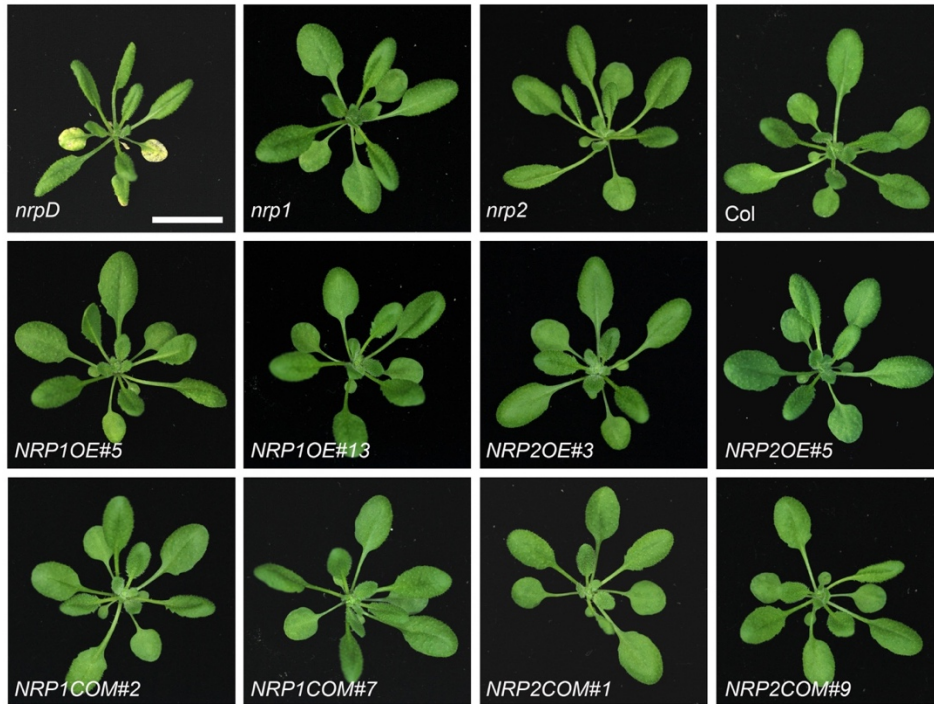

12

13 **Supplemental Figure S2.** Loss-of-function of *NRP1* and *NRP2* leads to precocious  
14 senescence. The seedlings were grown under LD conditions at 22°C for 21 days. Bar =  
15 2 cm. OE, overexpression transgenic line; COM, complementation transgenic line.

16

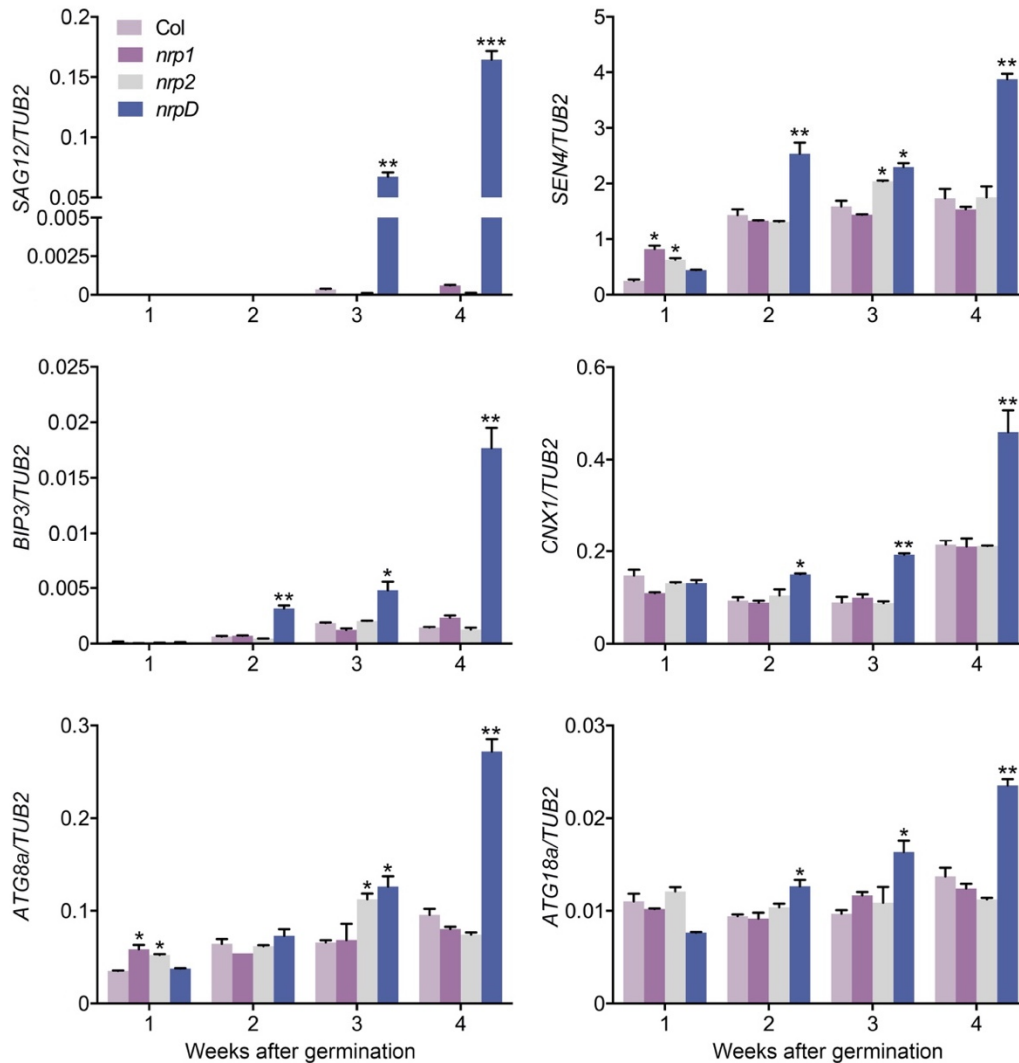

17

18 **Supplemental Figure S3.** The expression analysis of senescence, ER stress, and  
 19 autophagy-related marker genes in *Col*, *nrp1*, *nrp2*, and *nrpD* at different growth stages.  
 20 Seedlings were germinated on 1/2 MS medium and grown for 4 weeks. The whole  
 21 seedlings were collected for RNA extraction at indicated time. *TUB2* was used as an  
 22 internal control for calculation of relative gene expression level. Asterisks indicate  
 23 significant differences compared with *Col* (Student's *t*-test, \**P* < 0.05; \*\**P* < 0.01;  
 24 \*\*\**P* < 0.001). Data represent means  $\pm$  SD of biological triplicates.

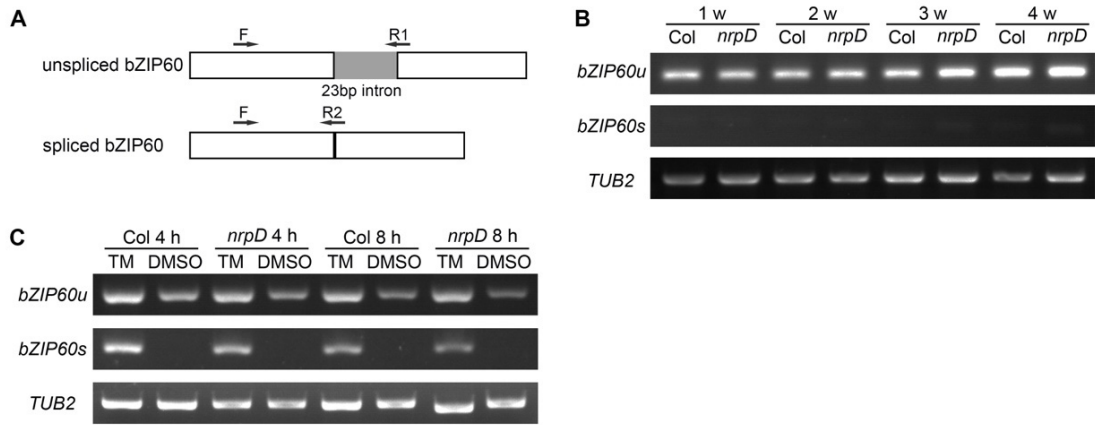

25

26 **Supplemental Figure S4.** *bZIP60* mRNA splicing analysis. A, Specific primers were  
 27 used to specifically detect the unspliced/spliced *bZIP60* mRNA. F, forward primer for  
 28 unspliced/spliced *bZIP60* RNA forms; R1, reverse primer 1 for unspliced *bZIP60* RNA  
 29 forms; R2, reverse primer 2 for spliced *bZIP60* RNA forms. B, *bZIP60* mRNA splicing  
 30 analysis under different growth stages. C, Tunicamycin (TM) induction of *bZIP60*  
 31 mRNA splicing. *TUB2* was used as control. *bZIP60u*, unspliced *bZIP60*; *bZIP60s*,  
 32 spliced *bZIP60*.

33

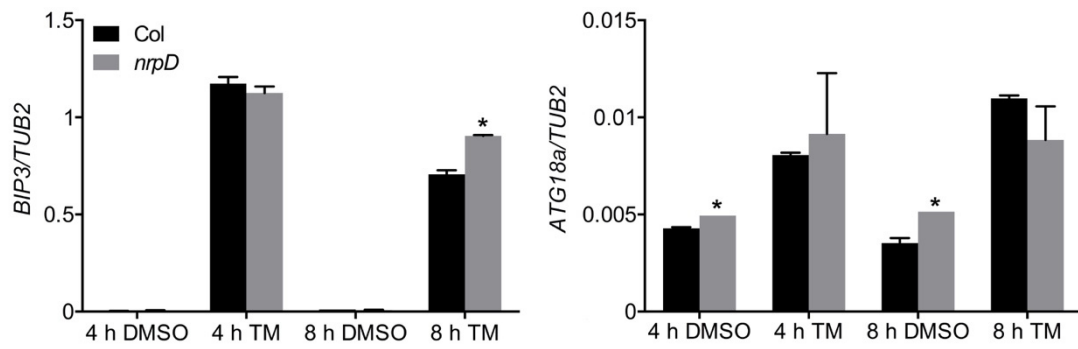

34

35 **Supplemental Figure S5.** The expression analysis of *BIP3* and *ATG18a* in Col and  
 36 *nrpD*. Seven-day-old seedlings were treated with 1  $\mu\text{g}/\text{mL}$  TM (DMSO as mock) for  
 37 indicated time. *TUB2* was used as an internal control for calculation of relative gene  
 38 expression level. Asterisks indicate significant differences compared with Col  
 39 (Student's *t*-test,  $*P < 0.05$ ). Data represent means  $\pm$  SD of biological triplicates.

40

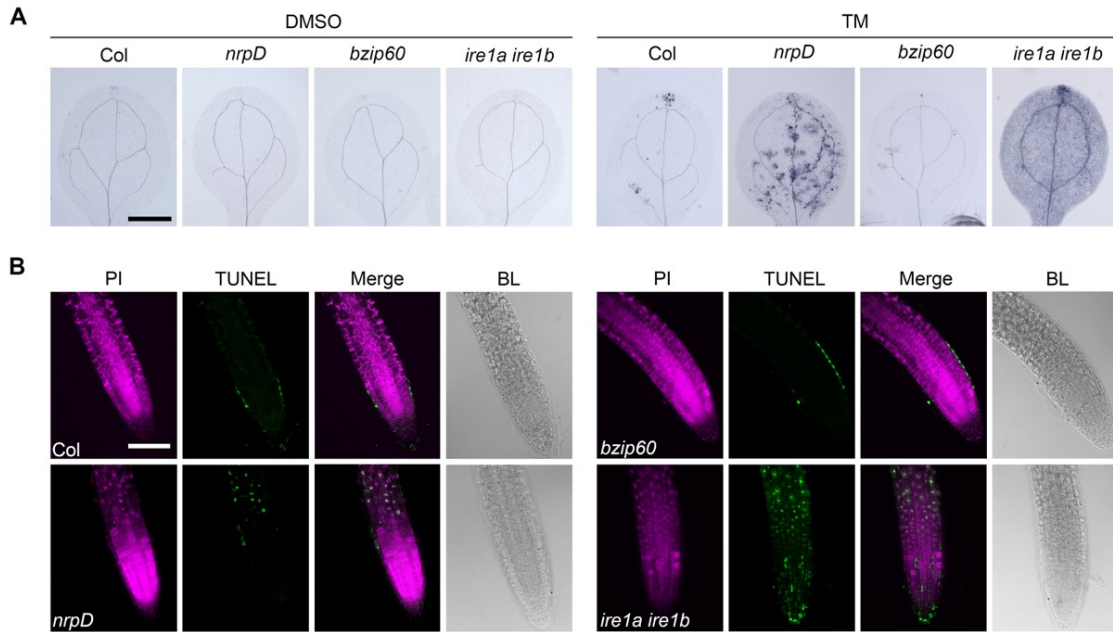

41

42 **Supplemental Figure S6.** The trypan blue staining and TUNEL assay of *bzip60* and  
 43 *ire1a ire1b*. Seven-day-old seedlings were treated with TM (DMSO as mock) for 2 d  
 44 and collected for trypan blue staining (A) or TUNEL labeling (B). Bar = 2 mm in (A),  
 45 and 100  $\mu$ m in (B). TM, tunicamycin; PI, propidium iodide; TUNEL, terminal  
 46 deoxynucleotidyl transferase-mediated dUTP nick and labeling; BL, bright light.

47

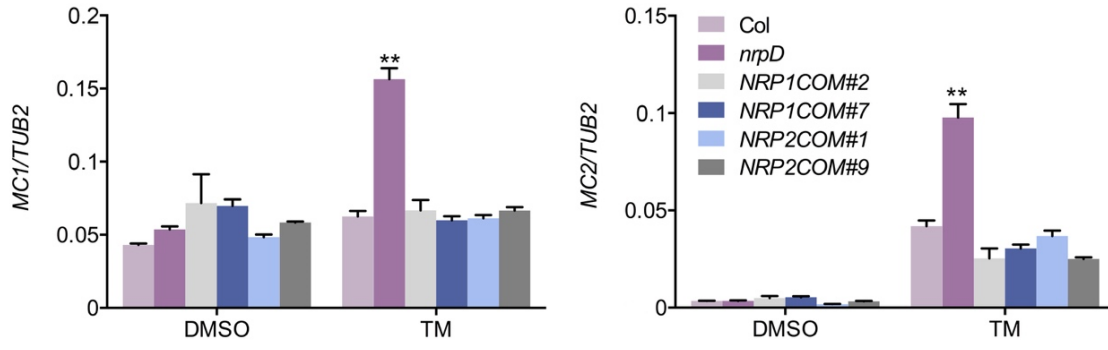

48

49 **Supplemental Figure S7.** The expression analysis of *MC1* and *MC2* in Col and the  
50 complementation transgenic lines. Seven-day-old seedlings were treated with 1  $\mu\text{g/mL}$   
51 TM (DMSO as mock) for 5 d. *TUB2* was used as an internal control. Asterisks indicate  
52 significant differences compared with Col (Student's *t*-test,  $**P < 0.001$ ). Data  
53 represent means  $\pm$  SD of biological triplicates.

54

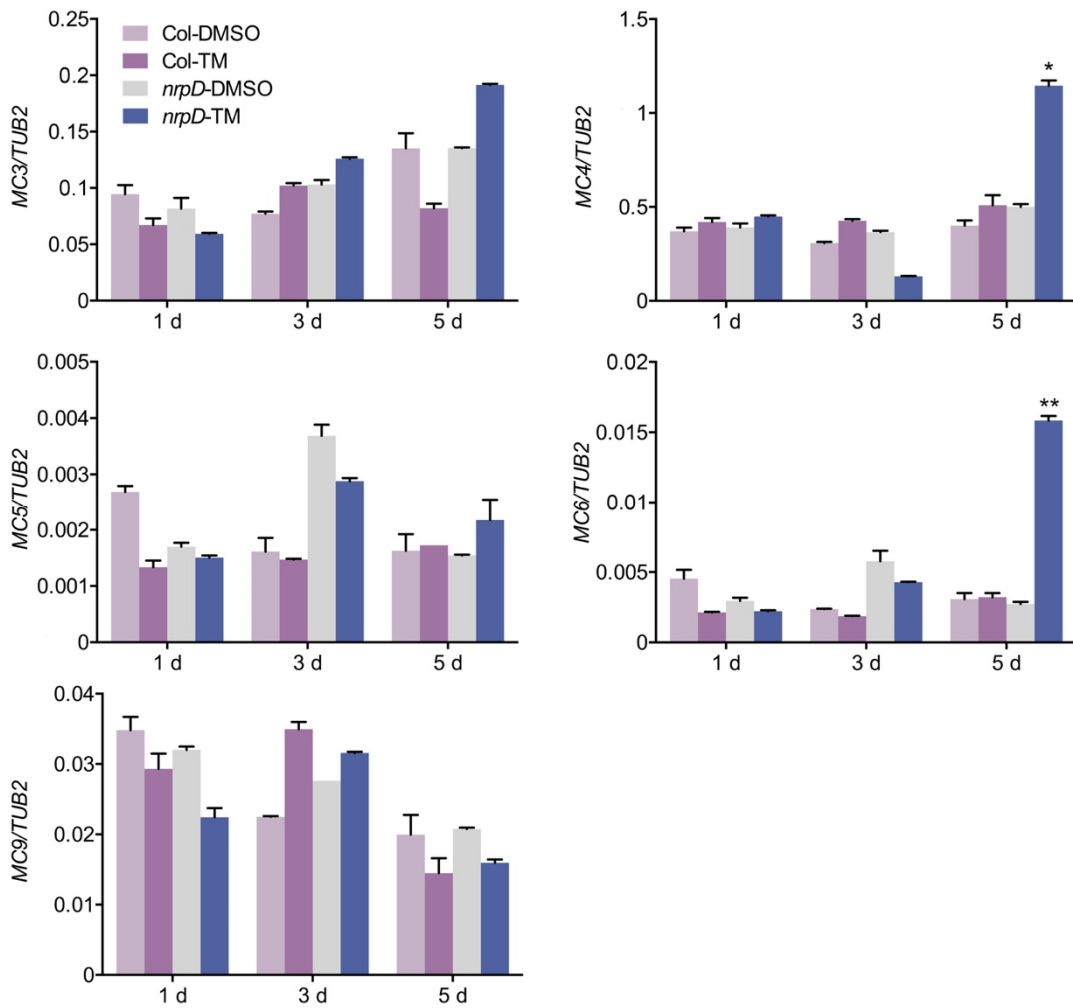

56

57 **Supplemental Figure S8.** The expression analysis of MC genes in Col and *nrpD*.  
 58 Seven-day-old seedlings were treated with 1  $\mu\text{g/mL}$  TM (DMSO as mock) for indicated  
 59 days. *TUB2* was used as an internal control for calculation of relative gene expression  
 60 level. Asterisks indicate significant differences compared with Col (Student's *t*-test, \**P*  
 61 < 0.01; \*\**P* < 0.001). Data represent means  $\pm$  SD of biological triplicates.  
 62



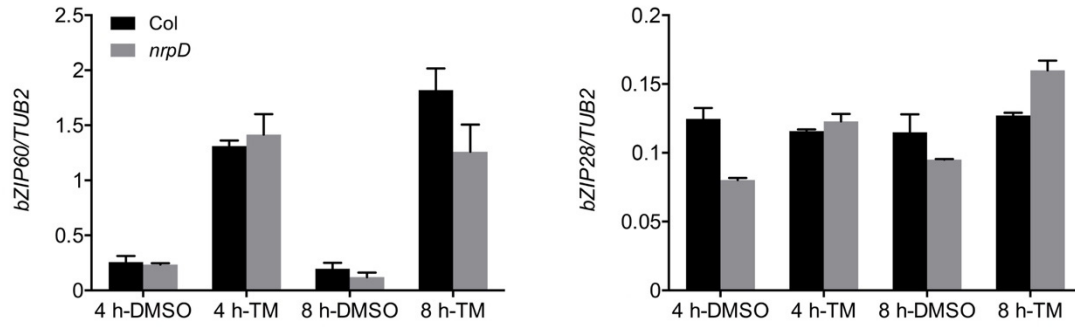

63

64 **Supplemental Figure S9.** The expression analysis of *bZIP60* and *bZIP28* in Col and  
 65 *nrpD*. Seven-day-old seedlings were treated with 1  $\mu\text{g}/\text{mL}$  TM (DMSO as mock) for  
 66 indicated time. *TUB2* was used as an internal control for calculation of relative gene  
 67 expression level. Data represent means  $\pm$  SD of biological triplicates.

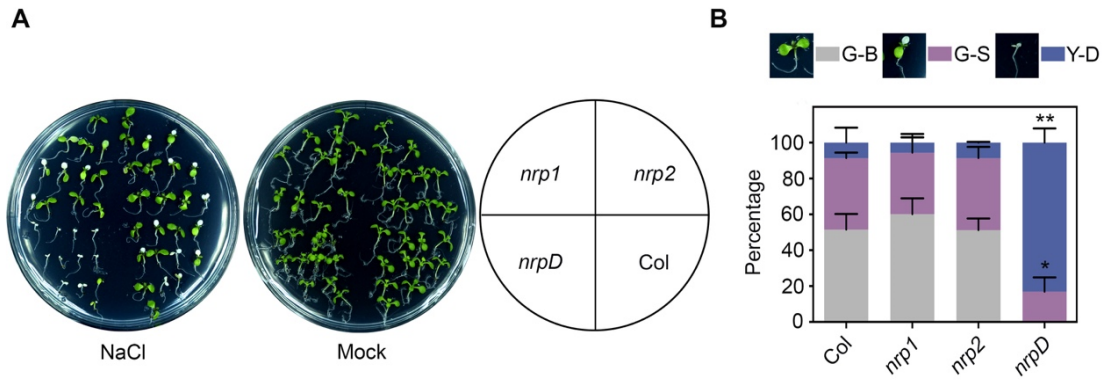

68

69 **Supplemental Figure S10.** The double mutant *nrpD* exhibits less tolerance to salt  
 70 stress. Seven-day-old seedlings were transferred to 1/2 MS medium with or without  
 71 150 mM NaCl for 7 d and the picture was taken (A). The percentages of green-big (G-  
 72 B), green-small (G-S), and yellow-dead (Y-D) seedlings were calculated (B). The  
 73 images next to the boxes display the phenotype of plants in the three groups. Asterisks  
 74 indicate significant differences compared with Col (Student's *t*-test, \* $P < 0.01$ ; \*\* $P <$   
 75  $0.001$ ). Data represent means  $\pm$  SD of biological triplicates.

76

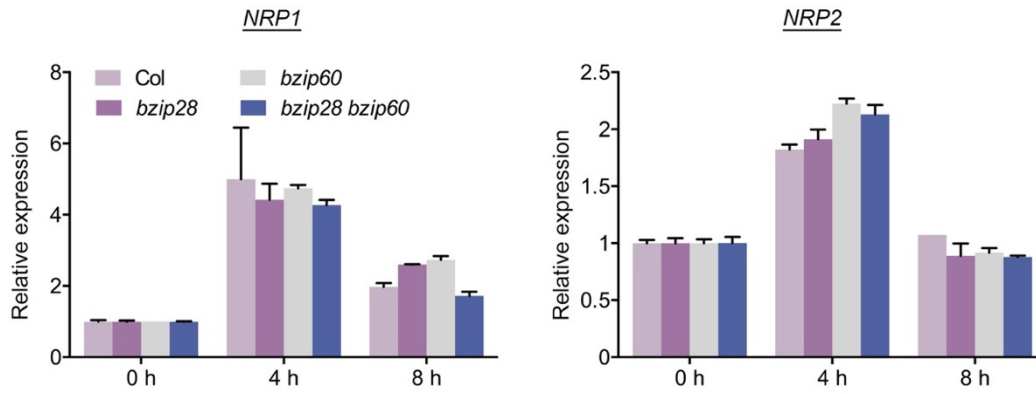

77

78 **Supplemental Figure S11.** The expression analysis of *NRP1* and *NRP2* in Col, *bzip28*,  
 79 *bzip60*, and *bzip28 bzip60* under salt stress. Seven-day-old seedlings were treated with  
 80 or without 150 mM NaCl. *TUB2* was used as an internal control. Data represent means  
 81  $\pm$  SD of biological triplicates.

82

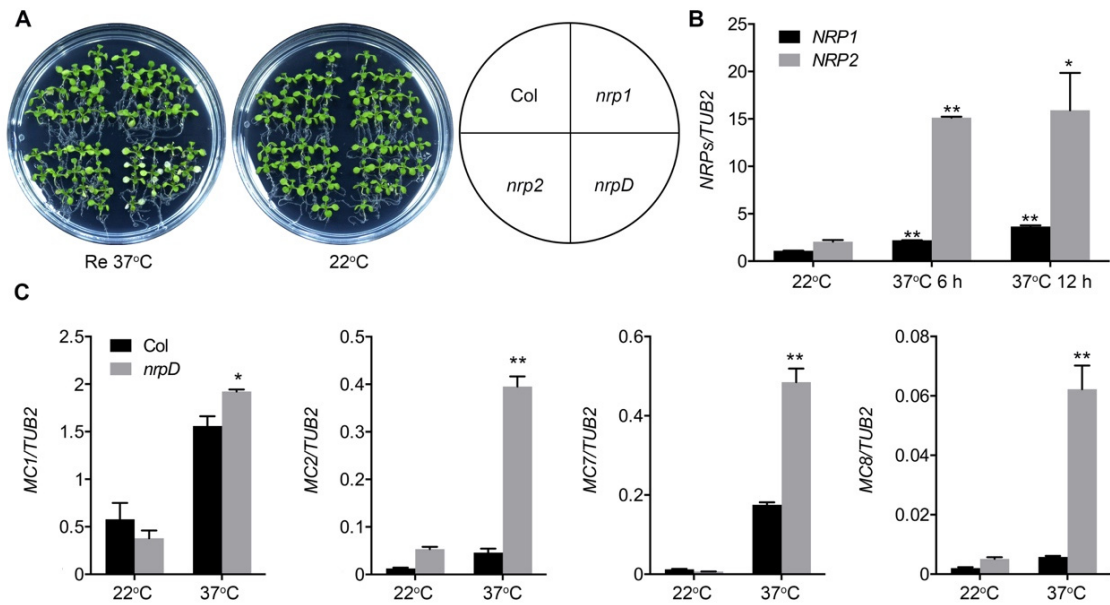

83

84 **Supplemental Figure S12.** *NRP1* and *NRP2* are involved in heat stress response. A,  
 85 The double mutant *nrpD* exhibits less heat stress tolerance. Ten-day-old plants were  
 86 incubated at 37°C for 1 d then grown at 22°C for 4 d. Re 37°C, recovered from 37°C.  
 87 B, The expression analysis of *NRP1* and *NRP2* at 37°C. C, The expression analysis of  
 88 *MC* genes in Col and *nrpD* under heat stress. Ten-day-old plants were incubated at  
 89 37°C for 1 d. *TUB2* was used as an internal control for calculation of relative gene  
 90 expression level. Asterisks indicate significant differences compared with 22°C (B) or  
 91 Col (C) (Student's *t*-test, \**P* < 0.01; \*\**P* < 0.001). Data represent means ± SD of  
 92 biological triplicates.

93

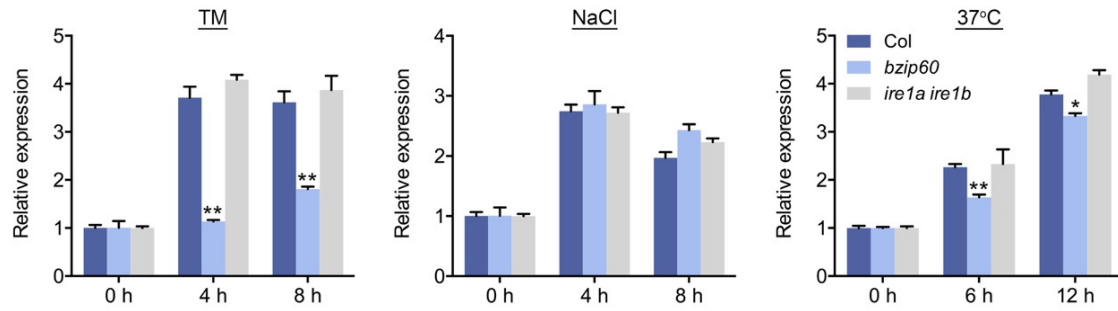

94

95 **Supplemental Figure S13.** The expression analysis of *NRPI* in *ire1a ire1b* mutant  
 96 under ER stress, high salinity stress, and heat stress. Seven-day-old seedlings were  
 97 treated with 1  $\mu\text{g/mL}$  TM or 150 mM NaCl, and ten-day-old seedlings were incubated  
 98 at 37°C. *TUB2* was used as an internal control. Asterisks indicate significant differences  
 99 compared with *Col* (Student's *t*-test, \* $P < 0.01$ ; \*\* $P < 0.001$ ). Data represent means  $\pm$   
 100 SD of biological triplicates.

101

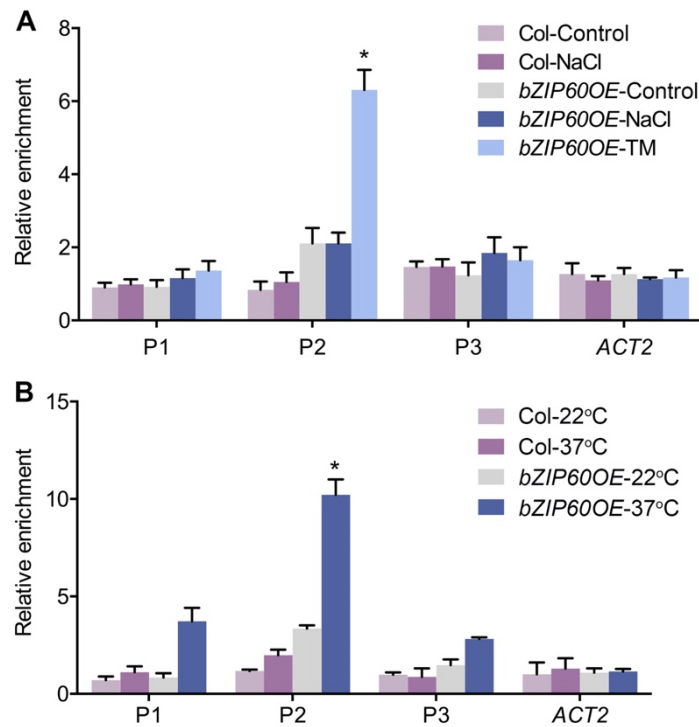

102

103 **Supplemental Figure S14.** ChIP analysis of bZIP60 binding to the *NRPI* promoter  
 104 under salt and heat stress. Seven-day-old of *35S:FLAG-bZIP60* and Col seedlings were  
 105 treated with 150 mM NaCl (A), and ten-day-old seedlings were incubated at 37°C for  
 106 4 h (B), and harvested for ChIP assay. *35S:FLAG-bZIP60* seedlings treated with TM  
 107 for 4 h were used as the positive control under salt stress (A). P1 to P3 represent the  
 108 fragments for ChIP-qPCR amplification as described in Figure 4A. The enrichment of  
 109 *ACT2* genomic fragment was used as the negative control. *PP2A* was used as an internal  
 110 control. Data represent mean  $\pm$  SD of triplicates. Asterisks indicate significant  
 111 differences compared with the control (Student's *t*-test, \* $P < 0.01$ ).

112

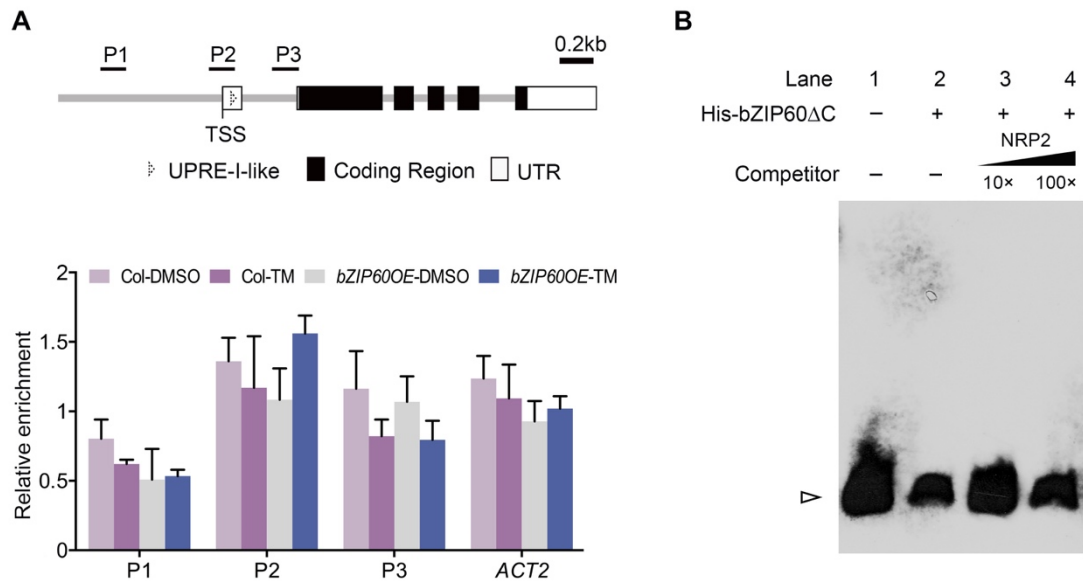

113

114 **Supplemental Figure S15.** ChIP and EMSA analysis of bZIP60 binding to the *NRP2*  
 115 genomic regions. A, The upper panel shows schematic diagram of the *NRP2* genomic  
 116 regions. P1 to P3 indicate fragments for ChIP-qPCR amplification. TSS, transcription  
 117 start site. The lower panel shows ChIP analysis of bZIP60 binding to the *NRP2* genomic  
 118 regions upon the precipitation with anti-FLAG antibody. Seven-day-old of *35S:FLAG-*  
 119 *bZIP60* and Col seedlings were treated with 1  $\mu\text{g}/\text{mL}$  TM (DMSO as mock) for 4 h and  
 120 harvested for ChIP assay. The enrichment of *ACT2* genomic fragment was used as the  
 121 negative control. *PP2A* was used as an internal control. Data represent mean  $\pm$  SD of  
 122 triplicates. B, EMSA experiment detecting the protein-DNA binding. The purified His-  
 123 bZIP60ΔC was incubated with the biotin-labeled *NRP2* DNA fragments (40 bp) (Lane  
 124 1~4). The un-labeled *NRP2* DNA were use as cold competitors. Lane 3, 10× un-labeled  
 125 *NRP2* (N2); lane 4, 100× un-labeled *NRP2*. White arrow head points to the free probes.  
 126

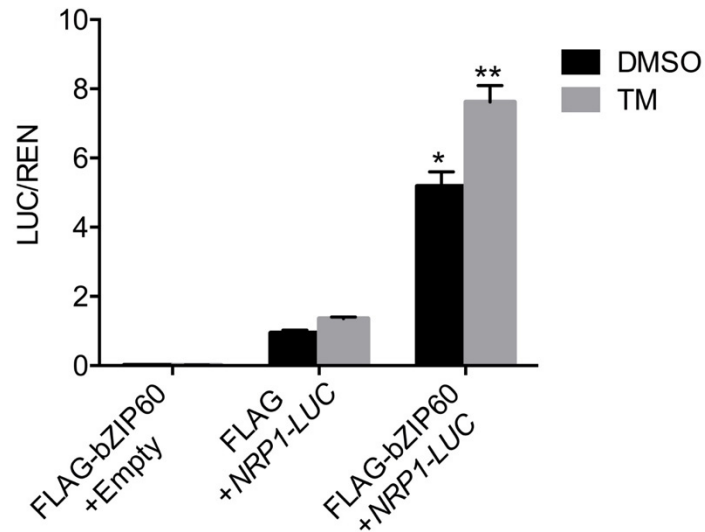

127

128 **Supplemental Figure S16.** Transient expression assay of the expression of *NRPI*  
 129 regulated by bZIP60. The reporters *pNRPI:LUC* and empty *LUC* (without *NRPI*  
 130 promoter, Empty) were co-transformed with *35S:FLAG-bZIP60* effectors (*35S:FLAG*  
 131 (FLAG), as a control) into *Arabidopsis irela irelb* mesophyll protoplasts, and then the  
 132 protoplasts were treated with 1 µg/mL TM (DMSO as mock) for 1 h after cultured  
 133 overnight. The LUC activity was calculated by relative LUC activity (LUC/REN).  
 134 Asterisks indicate significant differences compared with FLAG+*NRPI-LUC* under  
 135 DMSO or TM treatment, respectively (Student's *t*-test, \**P* < 0.01; \*\**P* < 0.001). The  
 136 values are means ± SD of biological triplicates. REN, renilla luciferase.



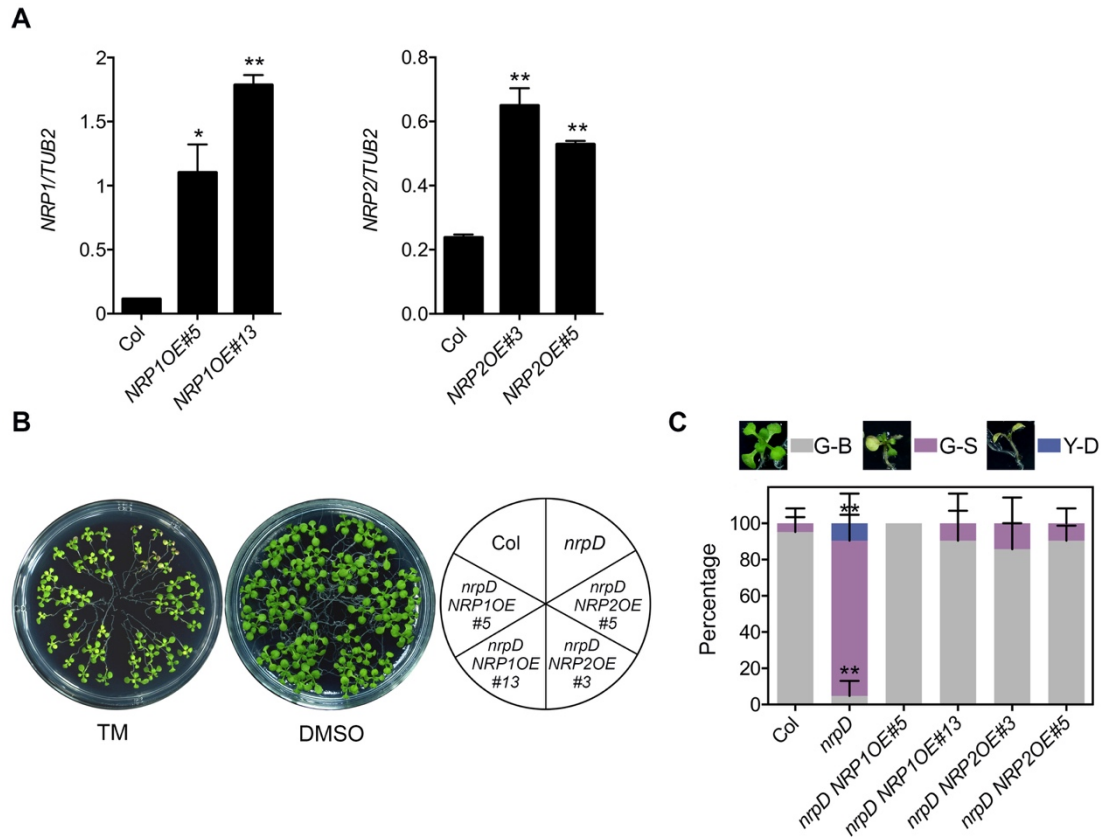

137

138 **Supplemental Figure S17.** The *NRPI/2* overexpression plants can rescue the *nrpD*  
 139 susceptibility to TM. A, The expression of *NRPI/2* in overexpression transgenic lines.  
 140 Seven-day-old seedlings were collected for RNA extraction. *TUB2* was used as an  
 141 internal control for calculation of relative gene expression level. B and C, TM  
 142 sensitivity of Col, *nrpD*, *nrpD NRPI1OE#5*, *nrpD NRPI1OE#13*, *nrpD NRPI2OE#3*, and  
 143 *nrpD NRPI2OE#5*. Seven-day-old seedlings were treated with 1  $\mu\text{g}/\text{mL}$  TM (DMSO as  
 144 control) for 10 d and the picture was taken (B). The percentages of green-big (G-B),  
 145 green-small (G-S), and yellow-dead (Y-D) seedlings were calculated(C). The images  
 146 next to the boxes display the phenotype of plants in the three groups. A and C, Asterisks  
 147 indicate significant differences compared with Col (Student's *t*-test, \* $P < 0.01$ ; \*\* $P <$   
 148 0.001). Data represent means  $\pm$  SD of biological triplicates.

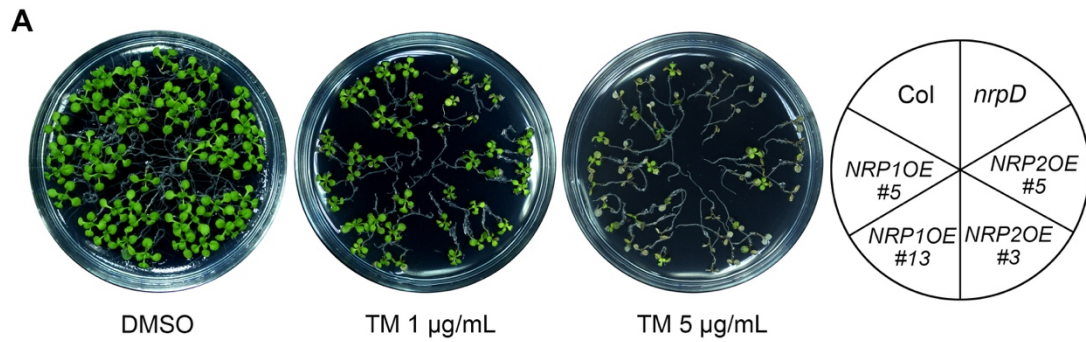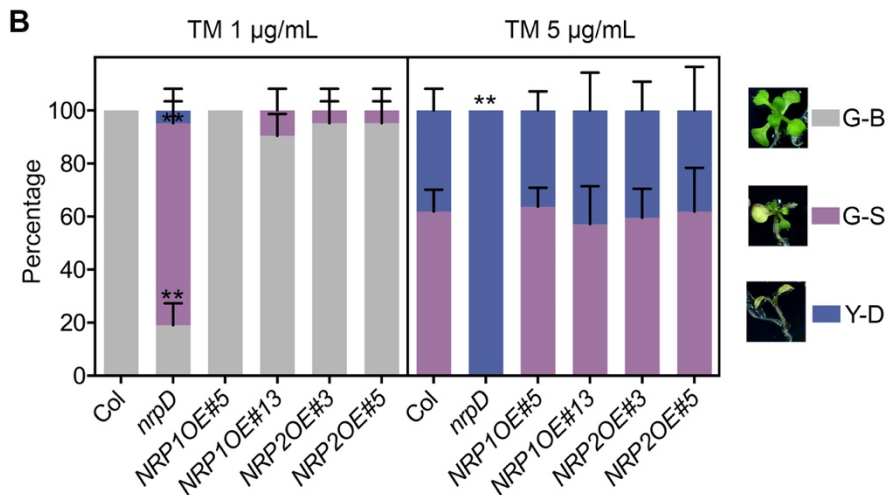

149

150 **Supplemental Figure S18.** The TM sensitivity of *NRP1/2* overexpression plants is  
151 similar to that of Col wild type. Seven-day-old Col, *nrpD*, *35S:NRP1-6HA* (*NRP1OE*#5  
152 and #13), and *35S:NRP2-6HA* (*NRP2OE*#3 and #5) seedlings were treated with 1 or 5  
153 µg/mL TM (DMSO as mock) for 10 d and the picture was taken (A). The percentages  
154 of green-big (G-B), green-small (G-S), and yellow-dead (Y-D) seedlings were  
155 calculated (B). The images next to the boxes display the phenotype of plants in the three  
156 groups. Asterisks indicate significant differences compared with Col (Student's *t*-test,  
157 \*\**P* < 0.001). Data represent means ± SD of biological triplicates.

158

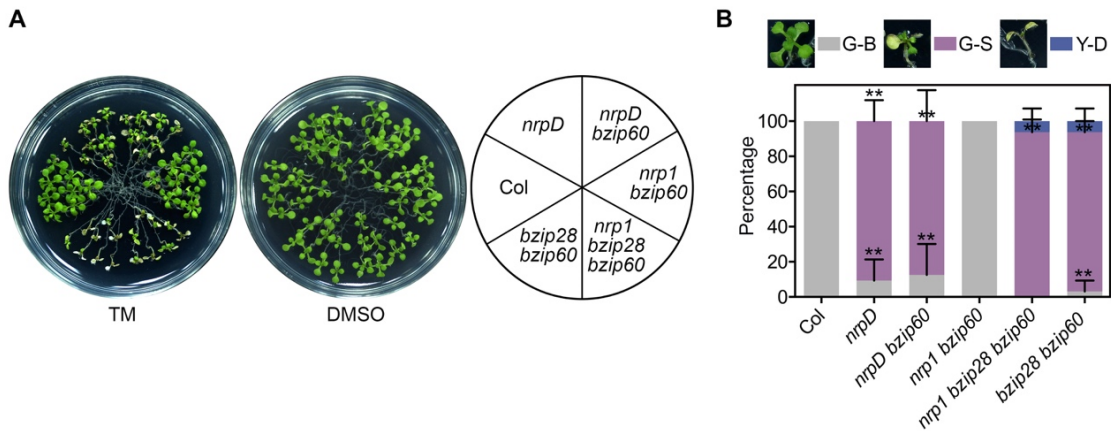

159

160 **Supplemental Figure S19.** The TM sensitivity of *nrp1 bzip60*, *nrpD bzip60*, and *nrp1*

161 *bzip28 bzip60*. Seven-day-old seedlings were treated with 0.5  $\mu\text{g}/\text{mL}$  TM (DMSO as

162 mock) for 10 d and the picture was taken (A). The percentages of green-big (G-B),

163 green-small (G-S), and yellow-dead (Y-D) seedlings were calculated (B). The images

164 next to the boxes display the phenotype of plants in the three groups. Asterisks indicate

165 significant differences compared with Col (Student's *t*-test,  $**P < 0.001$ ). Data

166 represent means  $\pm$  SD of biological triplicates.

167

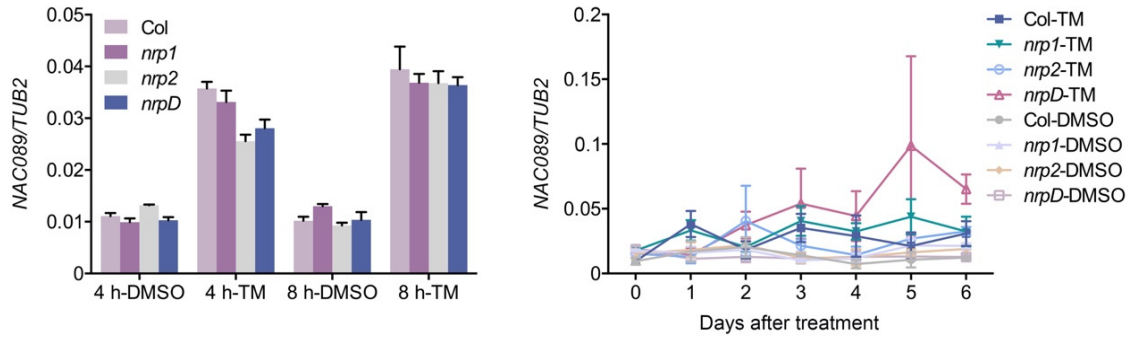

168

169 **Supplemental Figure S20.** The expression analysis of *NAC089* in *Col*, *nrp1*, *nrp2*, and  
 170 *nrpD*. Seven-day-old seedlings were treated with 1  $\mu\text{g/mL}$  TM (DMSO as mock) and  
 171 collected for RNA extraction for indicated time. The *TUB2* was used as an internal  
 172 control for calculation of relative gene expression level. Data represent means  $\pm$  SD of  
 173 biological triplicates.  
 174

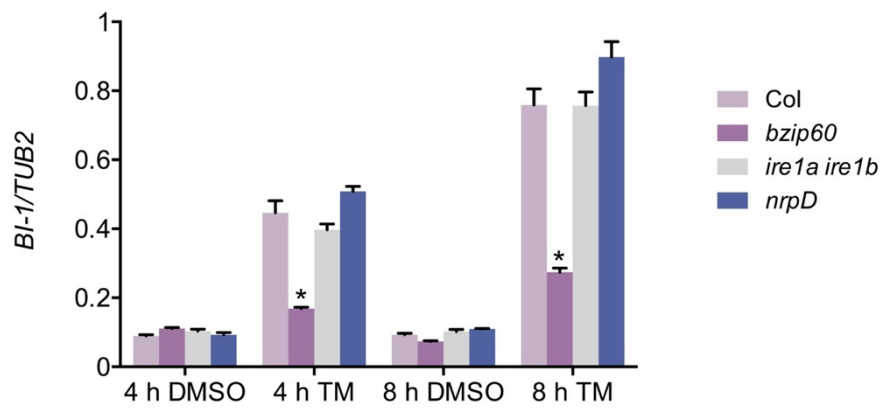

175

176 **Supplemental Figure S21.** The expression analysis of *BI-1* in Col, *bzip60*, *ire1a ire1b*,  
 177 and *nrpD*. Seven-day-old seedlings were treated with 1  $\mu\text{g/mL}$  TM (DMSO as mock)  
 178 and collected for RNA extraction for indicated time. The *TUB2* was used as an internal  
 179 control for calculation of relative gene expression level. Data represent means  $\pm$  SD of  
 180 biological triplicates. Asterisks indicate significant differences compared with Col  
 181 (Student's *t*-test, \*  $P < 0.001$ ).

182

183 **Supplemental Tables**184 **Supplemental Table S1. Primers used in this study.**

185 The restriction sites used for gene cloning are marked in bold.

| <b>Primers for quantitative RT-PCR</b> |                                    |
|----------------------------------------|------------------------------------|
| <b>Gene name</b>                       | <b>Primers sequence (5'-3')</b>    |
| <i>NRP1QPCR-F</i>                      | CTTTTGGCAGTTCAGCGAC                |
| <i>NRP1QPCR-R</i>                      | TGGTGGCGGCTATGTCTAAG               |
| <i>NRP2QPCR-F</i>                      | GACAGCTTCTGGCAATTAGG               |
| <i>NRP2QPCR-R</i>                      | TCAGTGTAACCTTTGGAGAGAT             |
| <i>SEN4QPCR-F</i>                      | CAATCCTCTGGAACCCTCAAAG             |
| <i>SEN4QPCR-R</i>                      | GTGTACCAATTGGAGTTTGGTTTCG          |
| <i>SAG12QPCR-F</i>                     | ACTGGTTTCAAAGGTGTCTCGGCAT          |
| <i>SAG12QPCR-R</i>                     | ACGCCCAACAACATCCGCAGC              |
| <i>MC1QPCR-F</i>                       | CAAGTGCATGCGTCACCTTC               |
| <i>MC1QPCR-R</i>                       | TGGAAGACAAGTGAGTCGCC               |
| <i>MC2QPCR-F</i>                       | TTCACTTCTCCGGTCACGG                |
| <i>MC2QPCR-R</i>                       | CACCTGAAGTCCTGTGGTCC               |
| <i>MC3QPCR-F</i>                       | CTAGTGGACATAGCTCGCGG               |
| <i>MC3QPCR-R</i>                       | CGCCGCATAAACTGCTCTC                |
| <i>MC4QPCR-F</i>                       | TGCCAAACCGATCAGACCTC               |
| <i>MC4QPCR-R</i>                       | ACCTGGCTGCTGAGTAAACC               |
| <i>MC5QPCR-F</i>                       | ATTACCCTGGAACCAAGGCG               |
| <i>MC5QPCR-R</i>                       | TCACCCGGTTTAGCGGATTC               |
| <i>MC6QPCR-F</i>                       | GATAAGCCTCGTCGAACGGT               |
| <i>MC6QPCR-R</i>                       | TCACCCGATTTAGCCGGTTC               |
| <i>MC7QPCR-F</i>                       | GAGAGTACCACGACGAAGCC               |
| <i>MC7QPCR-R</i>                       | GATCTCGCGGTCTCTACAT                |
| <i>MC8QPCR-F</i>                       | TGGAGTTACGTGGCTGTGTC               |
| <i>MC8QPCR-R</i>                       | AATCGCCAGATTGCCCTGAT               |
| <i>MC9QPCR-F</i>                       | TGATGGCAAGGGATGTGCTT               |
| <i>MC9QPCR-R</i>                       | GGTTGAGAAAGGAACGTCGC               |
| <i>NAC89QPCR-F</i>                     | GAAGCGGAAGATGGATGGCT               |
| <i>NAC89QPCR-R</i>                     | CACGCGCACAGAAGAAGAAC               |
| <i>TUB2QPCR-F</i>                      | ATCCGTGAAGAGTACCCAGAT              |
| <i>TUB2QPCR-R</i>                      | AAGAACCATGCACTCATCAGC              |
|                                        |                                    |
| <b>Primers for constructs</b>          |                                    |
| <b>Construct name</b>                  | <b>Primers sequence (5'-3')</b>    |
| <i>35S:NRP1-6HA-F</i>                  | GGCGAATTCATGGAGTATAATAACAACAATCAGC |

|                                |                                    |
|--------------------------------|------------------------------------|
| <i>35S:NRP1-6HA-R</i>          | TAACCCGGGAGGGTTTTGGTCAGCAAAAAT     |
| <i>35S:NRP2-6HA-F</i>          | TCAAAGCTTATGGACAGCTTCTGGCAAT       |
| <i>35S:NRP2-6HA-R</i>          | TATCTGCAGTGCAGAACCAGCTTGTTTCG      |
| <i>pNRP1:NRP1-mVenus-F</i>     | GGCGAATTCATGGAGTATAATAACAACAATCAGC |
| <i>pNRP1:NRP1-mVenus-R</i>     | TAACCCGGGAGGGTTTTGGTCAGCAAAAAT     |
| <i>pNRP2:NRP2-mVenus-F</i>     | TCAAAGCTTATGGACAGCTTCTGGCAAT       |
| <i>pNRP2:NRP2-mVenus-R</i>     | TATCTGCAGTGCAGAACCAGCTTGTTTCG      |
| <i>pNRP1:LUC-F</i>             | GGCGAATTCAATGATCAAACAACCTCT        |
| <i>pNRP1:LUC-R</i>             | CGCACTAGTCTCTAACTCTCTGATTGATCT     |
| <i>pNRP2:LUC-F</i>             | CGGCGAATTCTACTTTTTGTACTACGAAT      |
| <i>pNRP2:LUC-R</i>             | TTACCCGGGATCTCAAAGGCTAG            |
| <i>35S:bZP60ΔC-FLAG-F</i>      | CCCGGATCCATGGCGGAGGAATTTGGAAG      |
| <i>35S:bZP60ΔC-FLAG-R</i>      | ACGCGTCGACAGACTCCTGCTTCGACATC      |
| <i>35S:FLAG-bZIP60-F</i>       | CCCGGATCCATGGCGGAGGAATTTGGAAG      |
| <i>35S:FLAG-bZIP60-R</i>       | TACTCTAGACGCCGCAAGGGTTAAGATTTG     |
| <i>His-bZIP60-F</i>            | CCCGGATCCATGGCGGAGGAATTTGGAAG      |
| <i>His-bZIP60-R</i>            | ACGCGTCGACAGACTCCTGCTTCGACATC      |
|                                |                                    |
| <b>Primers for ChIP assays</b> |                                    |
| <b>Gene name</b>               | <b>Primers sequence (5'-3')</b>    |
| <i>ACT2-F</i>                  | ACTCGTTTCGCTTTCCTTA                |
| <i>ACT2-R</i>                  | CGGATCTAGAGACTCACCTTG              |
| <i>PP2A-F</i>                  | TATCGGATGACGATTCTTCGTGCAG          |
| <i>PP2A-R</i>                  | GCTTGGTCGACTATCGGAATGAGAG          |
| <i>NRP1P1-F</i>                | AACTGCTGTGAAACCTCCATTAG            |
| <i>NRP1P1-R</i>                | ACTTTAAGCCCATTCAATTACTGAT          |
| <i>NRP1P2-F</i>                | ACGCGTTTTTGGTGTTTGGT               |
| <i>NRP1P2-R</i>                | AGCATGTAGCAGCAGAGACG               |
| <i>NRP1P3-F</i>                | TGTGCTATTTTTGTGTGGGTGG             |
| <i>NRP1P3-R</i>                | GGGCAAGAAGTGAATAGGAGC              |
| <i>NRP2P1-F</i>                | TGAAGAATAAGTCAGCAATCGTAGA          |
| <i>NRP2P1-R</i>                | CTTTAAAACAAAGTCTCTGCAGTC           |
| <i>NRP2P2-F</i>                | AAGATGAGGGGGTATTTGGGTAA            |
| <i>NRP2P2-R</i>                | GTTTCCTCGAAATCCGGCG                |
| <i>NRP2P3-F</i>                | TGTGTTTCAGTTGTTGATTAGGGTTT         |
| <i>NRP2P3-R</i>                | ATCTCAAAGGCTAGCATAAACAGA           |

187 **Supplemental Table S2. Probes used in this study.**

188 The lower-case letters represent mutated bases; underlines represent the sequences of  
189 native/ mutated UPRE element.

| <b>Probes for EMSA</b> |                                                    |
|------------------------|----------------------------------------------------|
| <b>Probe name</b>      | <b>sequence (5'-3')</b>                            |
| <i>NRP1 probe</i>      | CGGAACAATTGCAATTAT <u>GACGTGG</u> CAGACTTTTGAGAGG  |
| <i>NRP1-Mut1 probe</i> | CGGAACAATTGCAATTAT <u>TctgcaGG</u> CAGACTTTTGAGAGG |
| <i>NRP1-Mut2 probe</i> | CGGAACAATTGCAATTAT <u>GACGTGt</u> CAGACTTTTGAGAGG  |
| <i>NRP2 probe</i>      | CTCTCATTCTCTCTTCT <u>GACGTGTT</u> CCCTTCTTCGGTTT   |

190
